# Supplementary material for: Identification of the crystallographic sites of Eu2+ in Ca9NaMg(PO4)7: structure and luminescence properties study
Source: Royal Society of Chemistry journal article supplement (doi:10.1039/c3dt52232f), 2013-01-01
Supplement: c3dt52232f.pdf [file c3dt52232f.pdf]

# Identification of the Crystallographic Sites of $\text{Eu}^{2+}$ in $\text{Ca}_9\text{NaMg}(\text{PO}_4)_7$ : Structure and Luminescence Properties Study

Zhiguo Xia<sup>\*,a</sup>, Haikun Liu<sup>a</sup>, Xia Li<sup>b</sup>, Chengying Liu<sup>a</sup>

<sup>a</sup>*School of Materials Sciences and Technology, China University of Geosciences, Beijing 100083, China*

<sup>b</sup>*College of Materials Science and Engineering, Qingdao University of Science and Technology, Qingdao 266042, People's Republic of China*

## Supporting Information

**Table S1.** Selected interatomic bond distances<sup>(a)</sup> of  $\text{Ca}_9\text{NaMg}(\text{PO}_4)_7:0.03\text{Eu}^{2+}$  phosphors.

|                        |            |                          |            |
|------------------------|------------|--------------------------|------------|
| Ca1—O8 <sup>i</sup>    | 2.32 (2)   | Ca3—O8 <sup>iv</sup>     | 2.53 (2)   |
| Ca1—O10 <sup>ii</sup>  | 2.344 (18) | Ca3—O1                   | 2.539 (7)  |
| Ca1—O2 <sup>iii</sup>  | 2.440 (12) | Ca3—O10 <sup>xiii</sup>  | 2.558 (15) |
| Ca1—O5 <sup>iv</sup>   | 2.499 (17) | Ca3—O3 <sup>xiv</sup>    | 2.569 (13) |
| Ca1—O6 <sup>i</sup>    | 2.504 (17) | Na—O3 <sup>xvi</sup> ×3  | 2.353 (13) |
| Ca1—O7 <sup>v</sup>    | 2.51 (2)   | Na—O2 <sup>xv</sup> ×3   | 2.83 (2)   |
| Ca1—O6 <sup>v</sup>    | 2.506 (15) | Mg—O6 <sup>xvii</sup> ×3 | 2.058 (17) |
| Ca1—O4 <sup>i</sup>    | 2.850 (16) | Mg—O9 <sup>xvi</sup> ×3  | 2.166 (17) |
| Ca2—O5 <sup>vi</sup>   | 2.334 (18) | P1—O1                    | 1.47 (2)   |
| Ca2—O9 <sup>vii</sup>  | 2.343 (13) | P1—O2 <sup>xv</sup> ×3   | 1.555 (12) |
| Ca2—O2 <sup>viii</sup> | 2.355 (12) | P2—O3                    | 1.510 (19) |
| Ca2—O9 <sup>ix</sup>   | 2.478 (16) | P2—O4                    | 1.520 (19) |
| Ca2—O4 <sup>ix</sup>   | 2.49 (2)   | P2—O6                    | 1.524 (9)  |
| Ca2—O7 <sup>vii</sup>  | 2.548 (17) | P2—O5 <sup>xviii</sup>   | 1.580 (17) |
| Ca2—O3                 | 2.548 (18) | P3—O7                    | 1.504 (18) |
| Ca2—O8 <sup>ix</sup>   | 2.816 (16) | P3—O9                    | 1.520 (13) |
| Ca3—O5 <sup>x</sup>    | 2.425 (19) | P3—O10 <sup>xix</sup>    | 1.559 (19) |
| Ca3—O7 <sup>xi</sup>   | 2.428 (19) | P3—O8                    | 1.560 (15) |

|                        |            |  |  |
|------------------------|------------|--|--|
| Ca3—O10 <sup>xii</sup> | 2.439 (10) |  |  |
| Ca3—O4 <sup>vii</sup>  | 2.456 (15) |  |  |

<sup>a)</sup>Bond distances were verified at  $10^{-10}$  m (Å).

Symmetry codes: (i)  $-x+y+2/3, -x+4/3, z+1/3$ ; (ii)  $x, x-y+1, z-1/2$ ; (iii)  $-y+4/3, -x+2/3, z+1/6$ ; (iv)  $-y+2/3, x-y+1/3, z+1/3$ ; (v)  $-y+5/3, x-y+4/3, z+1/3$ ; (vi)  $-x+y+4/3, y+2/3, z+1/6$ ; (vii)  $-x+y+1/3, y-1/3, z+1/6$ ; (viii)  $-x+y, -x+1, z$ ; (ix)  $-y+4/3, -x+5/3, z+1/6$ ; (x)  $x-2/3, x-y-1/3, z+1/6$ ; (xi)  $x-1/3, y-2/3, z+1/3$ ; (xii)  $-y+2/3, x-y+1/3, z-2/3$ ; (xiii)  $x-1/3, y-2/3, z-2/3$ ; (xiv)  $x-2/3, x-y+2/3, z+1/6$ ; (xv)  $-y+1, x-y+1, z$ ; (xvi)  $-y+1, x-y, z$ ; (xvii)  $-x+y-1/3, y-2/3, z-1/6$ ; (xviii)  $x, y+1, z$ ; (xix)  $x, y, z-1$ .

**Table S2.** Lifetime for non-linear fitting components of  $\text{Ca}_9\text{NaMg}(\text{PO}_4)_7:x\text{Eu}^{2+}$  ( $x = 0.01 - 0.15$ ) phosphors excited at 370 nm with the emission monitored at 415 nm, 458 nm, and 625 nm.

| Lifetime                 | $x = 0.01$ | $x = 0.03$ | $x = 0.05$ | $x = 0.10$ | $x = 0.15$ |
|--------------------------|------------|------------|------------|------------|------------|
| $\tau$ at 415 nm<br>(ns) | 467.72     | 418.15     | 343.34     | 270.85     | 210.67     |
| $\tau$ at 458 nm<br>(ns) | 483.21     | 457.23     | 386.18     | 285.56     | 242.30     |
| $\tau$ at 625 nm<br>(ns) | 995.70     | 866.68     | 759.10     | 616.78     | 521.59     |

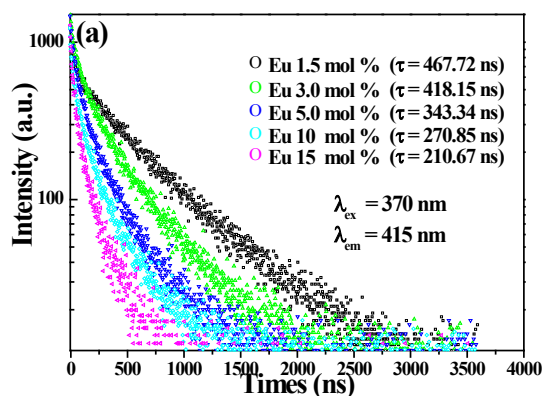

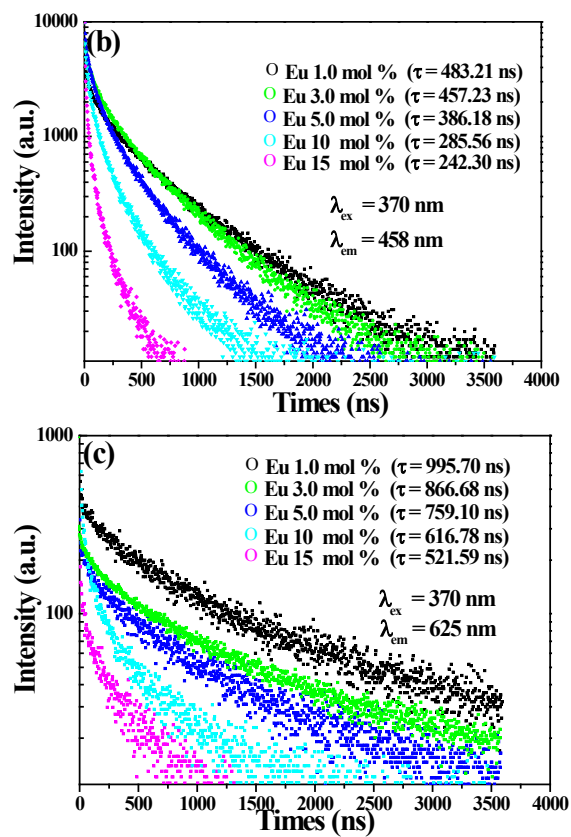

**Figure S1.** Decay curves of  $\text{Eu}^{2+}$  emission in  $\text{Ca}_9\text{NaMg}(\text{PO}_4)_7: x\text{Eu}^{2+}$  phosphors under excitation at 370 nm with different monitoring wavelengths are shown in (a)  $\lambda_{\text{em}} = 415$  nm, (b)  $\lambda_{\text{em}} = 458$  nm, and (c)  $\lambda_{\text{em}} = 625$  nm, respectively.

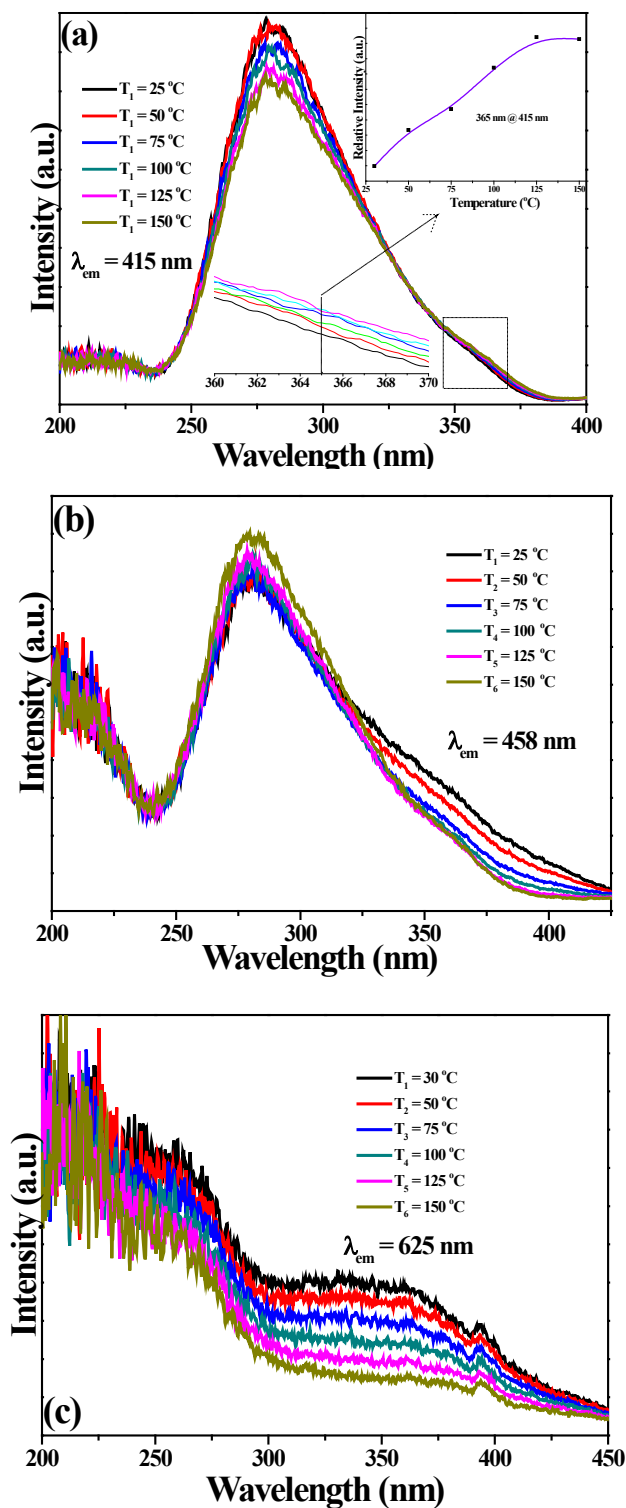

**Figure S2.** The PLE spectra of  $\text{Ca}_{8.97}\text{NaMg}(\text{PO}_4)_7:0.03\text{Eu}^{2+}$  phosphor with different excitation wavelengths under different temperatures in the range of 30–150  $^\circ\text{C}$  are shown in (a)  $\lambda_{\text{em}} = 415 \text{ nm}$ , (b)  $\lambda_{\text{em}} = 458 \text{ nm}$ , and (c)  $\lambda_{\text{em}} = 625 \text{ nm}$ , respectively.
